# Supplementary figures and images for: Cell Plasticity and Genomic Structure of a Novel Filterable Rhizobiales Bacterium that Belongs to a Widely Distributed Lineage
Source: MDPI journal article supplement (doi:10.3390/microorganisms8091373), 2020-09-07

## Before filtration

## After filtration

25°C for 2 weeks

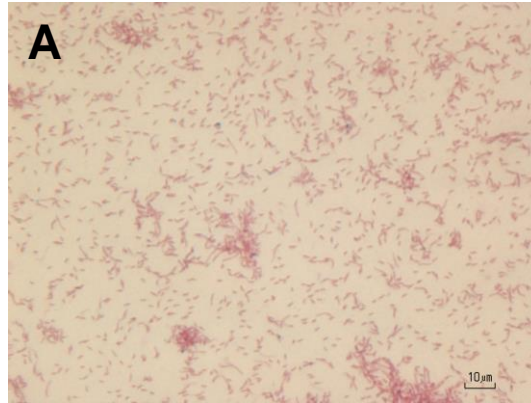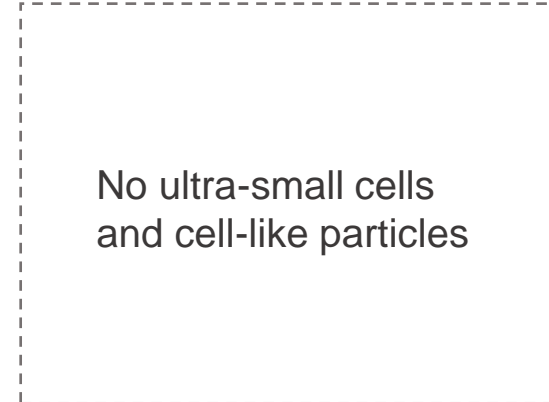

25°C for 2 weeks  
followed by  
4°C for 3 weeks

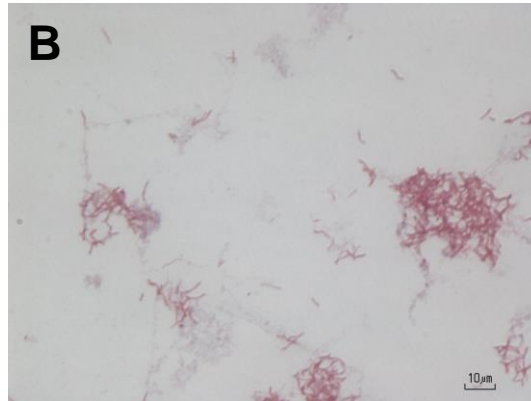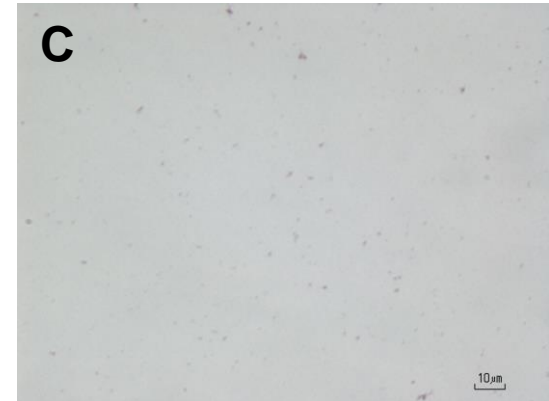

15°C for 3 weeks

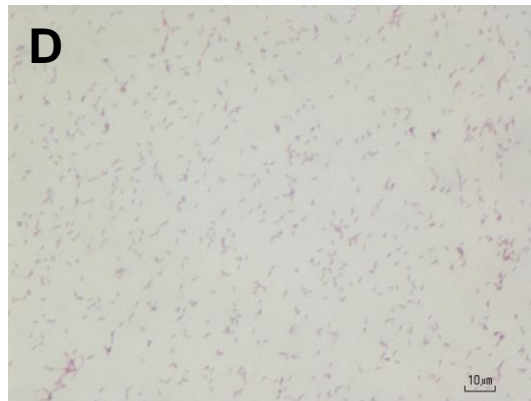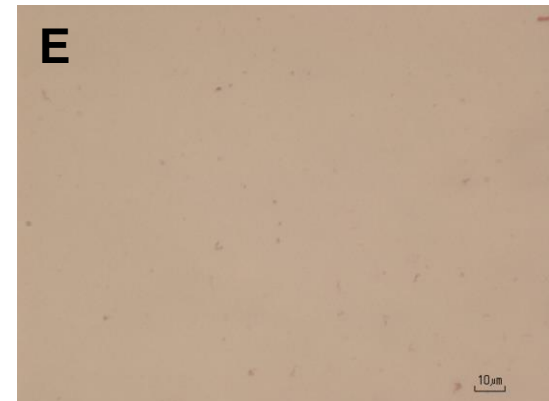

Supplement: s1 [file s1]

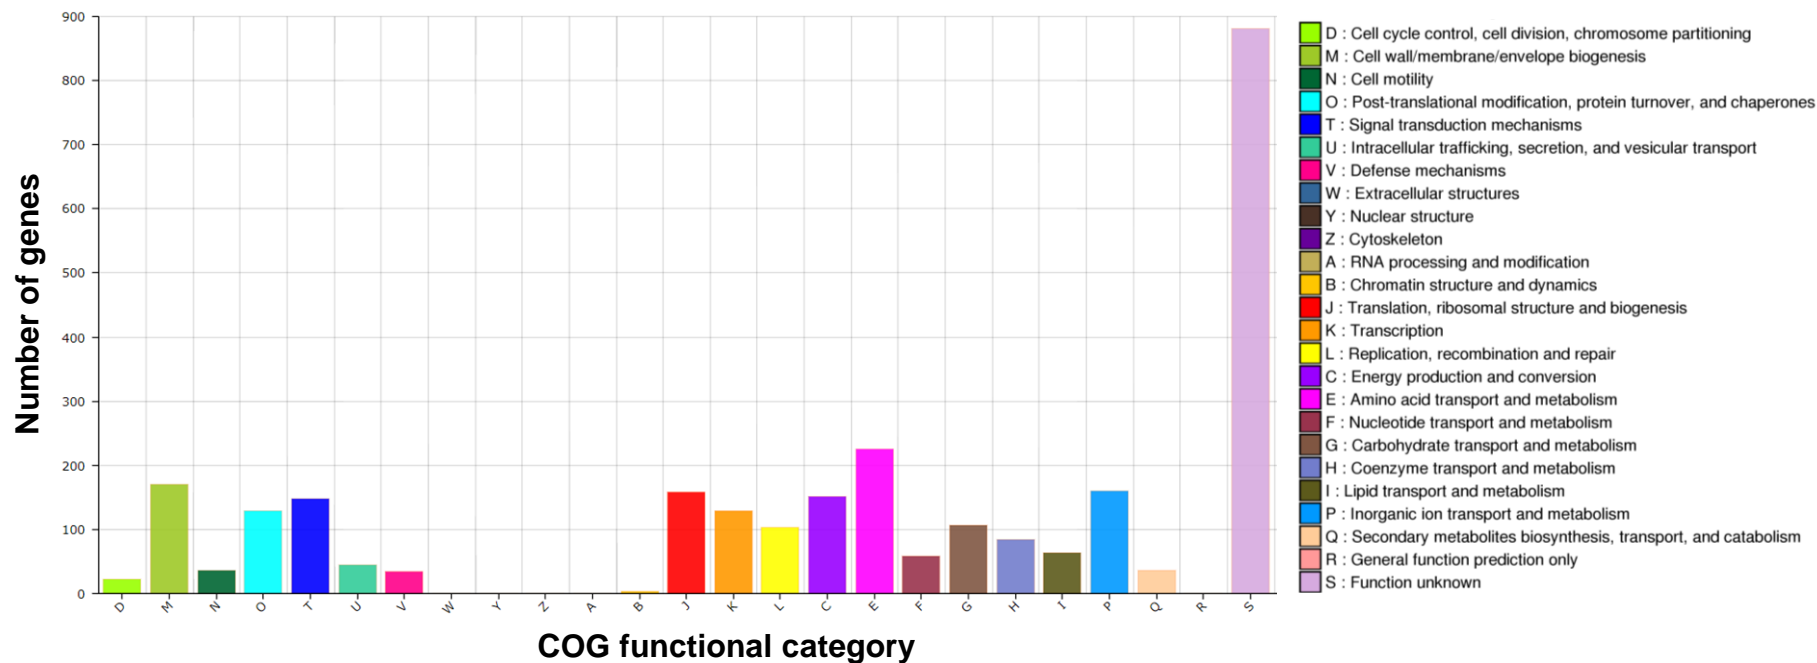

Supplement: s1 [file s1]

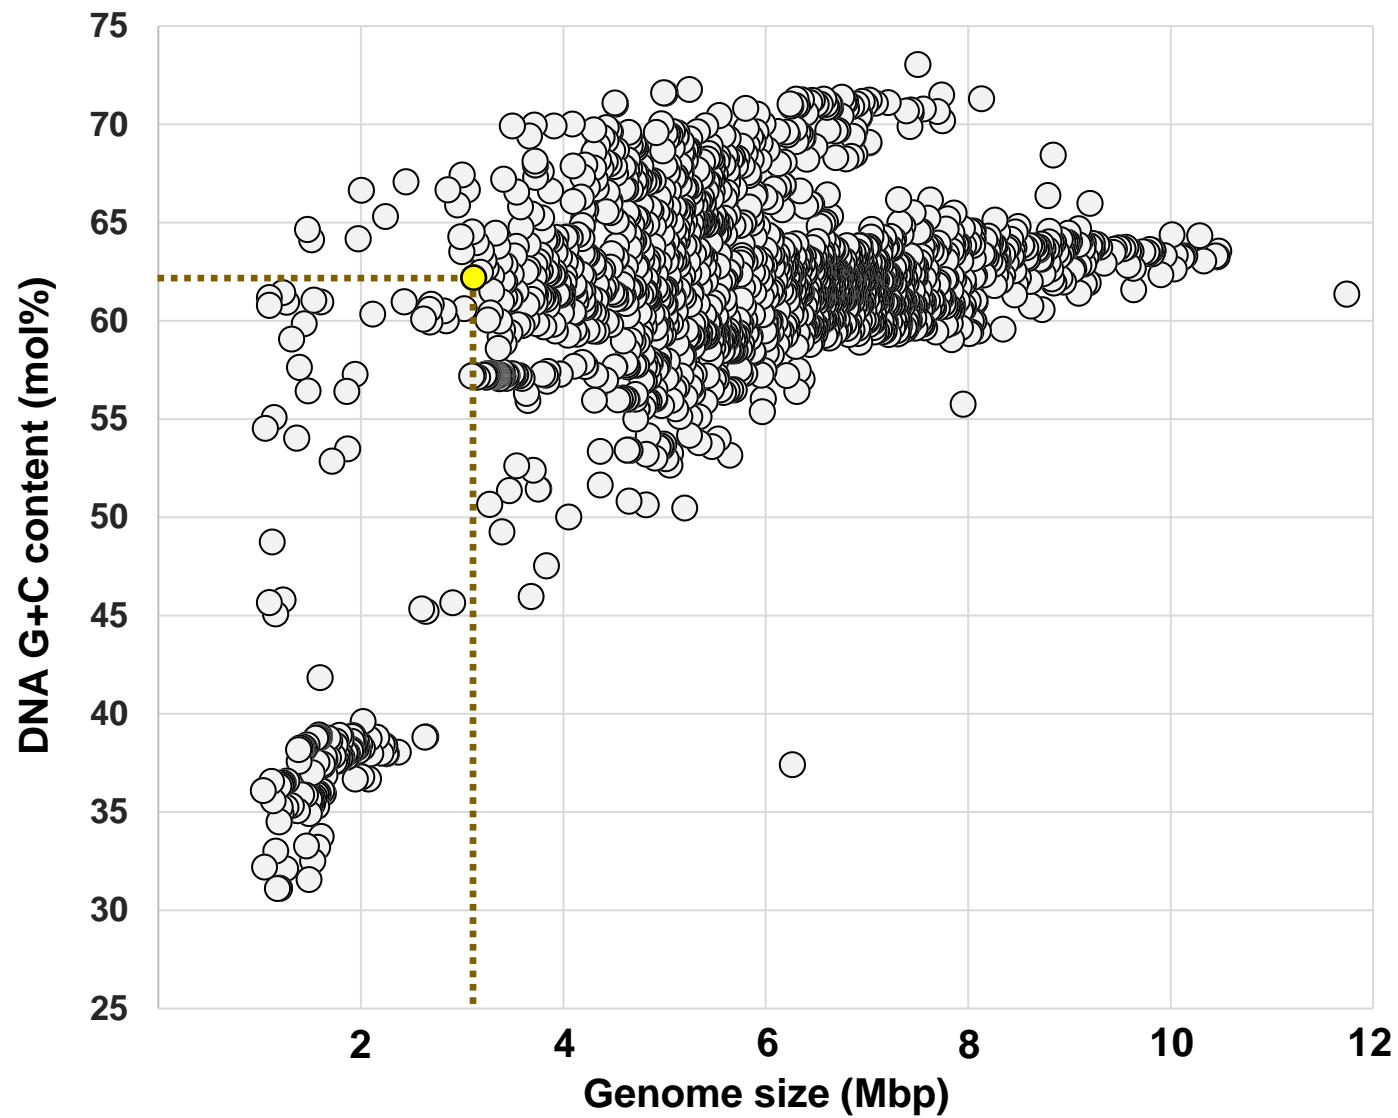

Supplement: s1 [file s1]
